# Supplementary material for: Using thiourea as a catalytic redox-active additive to enhance the performance of pseudocapacitive supercapacitors
Source: Royal Society of Chemistry journal article supplement (doi:10.1039/d1se01129d), 2021-01-01
Supplement: d1se01129d1.pdf [file d1se01129d1.pdf]

## Supporting Information

### **Using Thiourea as a Catalytic Redox-active Additive to Enhance the Performance of Pseudocapacitive Supercapacitors**

Xue Zhang<sup>a</sup>, Lingling Gao<sup>b</sup>, Ruihong Guo<sup>a</sup>, Tuoping Hu<sup>a</sup>, Mingming Ma<sup>ac</sup>

<sup>a</sup> Department of Chemistry, College of Science, North University of China, Taiyuan 030051, China.

<sup>b</sup> College of Chemistry and Chemical Engineering, Jinzhong University, Taiyuan 030619, China.

<sup>c</sup> Hefei National Laboratory for Physical Sciences at the Microscale, Department of Chemistry, University of Science and Technology of China, Hefei, Anhui 230026, China.

## **1.Experimental Section**

### ***1.1 Preparation of PPH samples***

PPH was synthesized according to the literature [1, 2]. Preparation of PVA with mass fraction of 10%: 1g PVA was dissolved in 9 mL distilled water, swelled at 60 °C and under magnetic stirring for 1 h, and then heated to 90 °C and stirred for 2 h to obtain PVA (10 wt%) solution. The prepared PVA solution (2 mL) and ABA (0.0364 g) were added into 835 mL HCl and 241 mL distilled water and 3.0 mmol AN, respectively to get solution A. 2 mmol of APS was added in distilled water (1 mL) to obtain solution B. The A and B solutions were respectively cooled at 0 °C in a mixture of ice and water, and then solution A was slowly transferred to solution B to form solution C under magnetic stirring. The resulting C solution was poured into the mold and stood for 24 h to synthesize PPH film, which was taken out and cleaned with deionized water to remove impurities.

### ***1.2 Structure characterization***

The thermal stability of samples was characterized by thermogravimetric analysis (TGA) on a ZCTA analyzer under a N<sub>2</sub> atmosphere from ambient temperature to 800 °C. The crystalline and phase purity of the composites were tested on Bruker D8 using Cu-K $\alpha$  radiation in the 2 $\theta$  range of 10° to 90°. Field emission scanning electron microscopy (SEM) and transmission electron microscopy (TEM) were used to analyze the morphology of samples. N<sub>2</sub> adsorption experiments were performed on an ASAP 2020 Plus instrument. The surface elements and valence states of the composites were analyzed by X-ray photoelectron spectroscopy (XPS) on VG instrument using X-ray source. Raman spectroscopic analysis was performed by a Renishaw micro Raman spectrometer under the irradiation of a 532 nm.

## 2. Supplementary figures

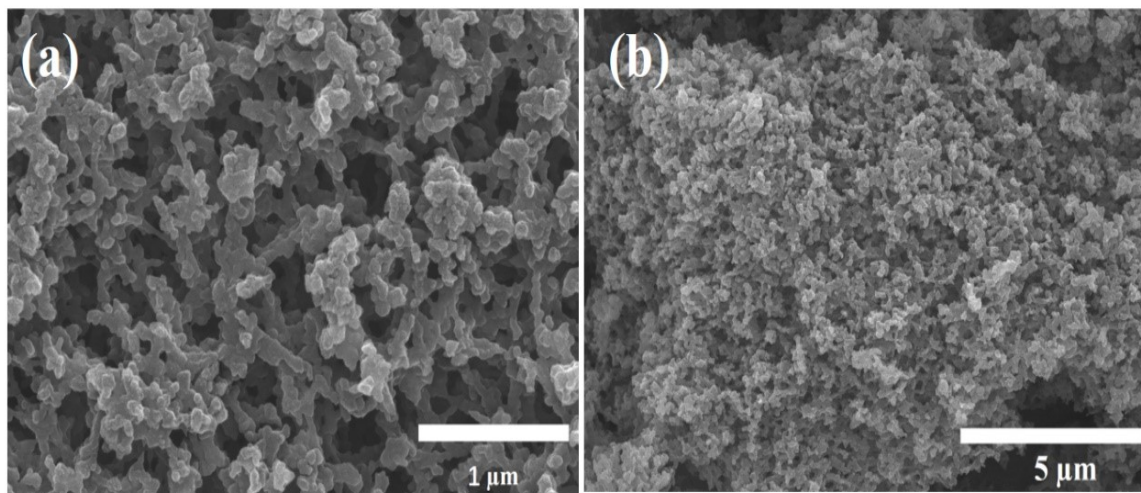

Fig.S1. PPH-600 SEM image.

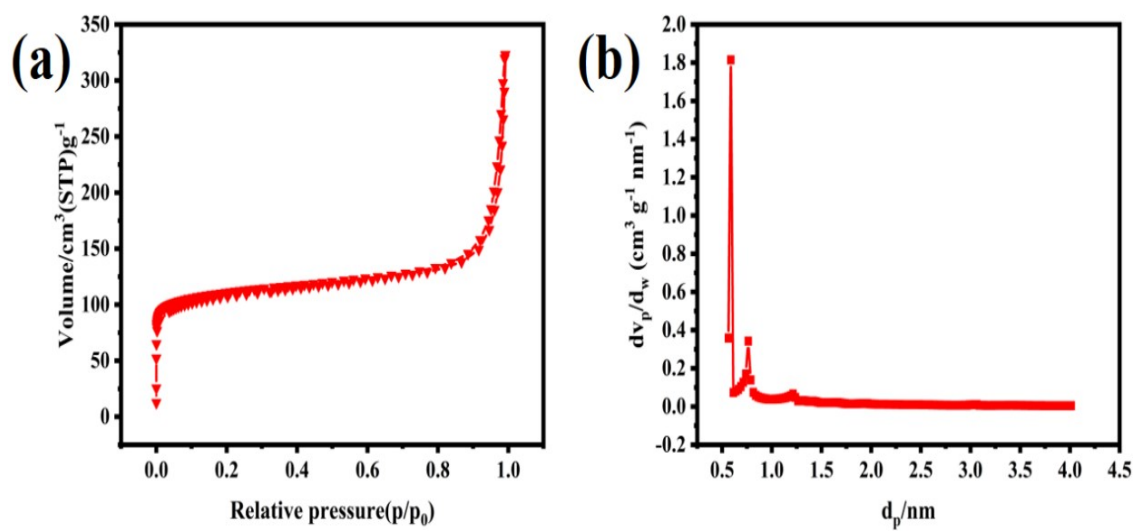

Fig.S2.  $\text{N}_2$  adsorption-desorption isotherms and pore size of PPH-600.

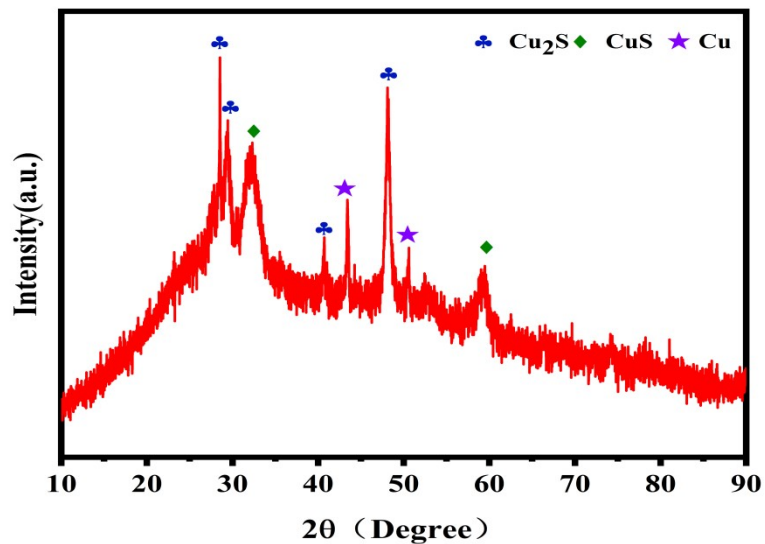

**Fig.S3.**XRD analysis of Cu@N-C-600 after 1000 CV cycles in KOH +KCl+ thiourea.

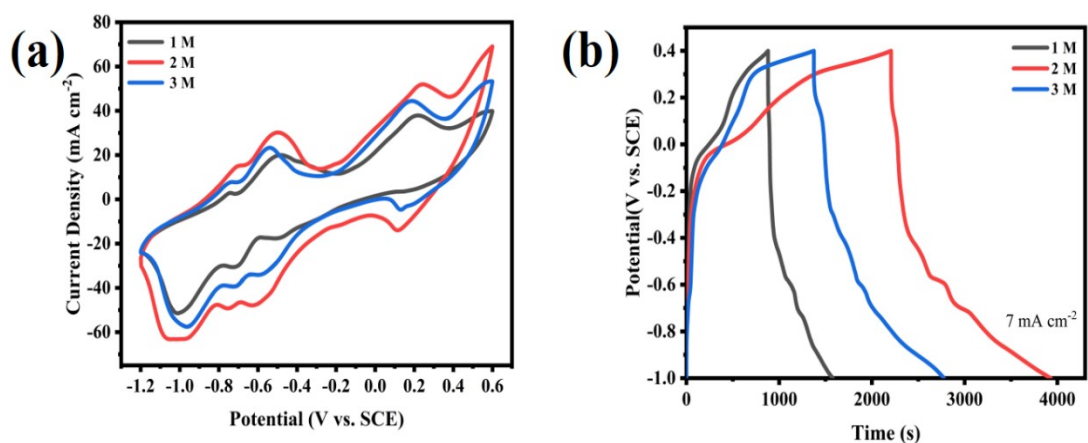

**Fig.S4.** Electrochemical test of Cu@N-C-600 samples prepared with different CuCl<sub>2</sub> concentrations (1-3 M). (a) CV at scan rate of 20 mV s<sup>-1</sup> and (b) GCD curves at current density of 7 mA cm<sup>-2</sup>.

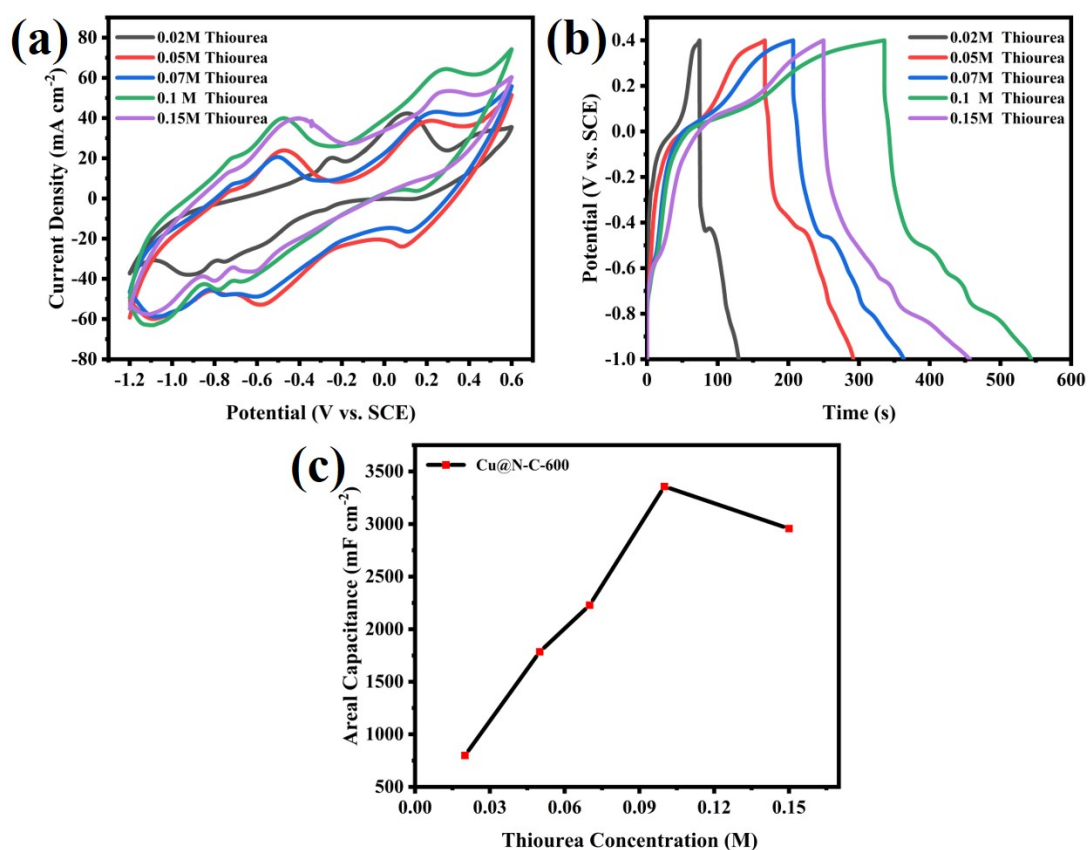

**Fig.S5.** Electrochemical properties of Cu@N-C-600 with different concentrations of thiourea in the electrolyte. (a)CV curves at scan rate of 20 mV cm<sup>-2</sup>; (b)GCD curves at current density of 20 mA cm<sup>-2</sup>;(c) Areal capacitance of Cu@N-C-600.

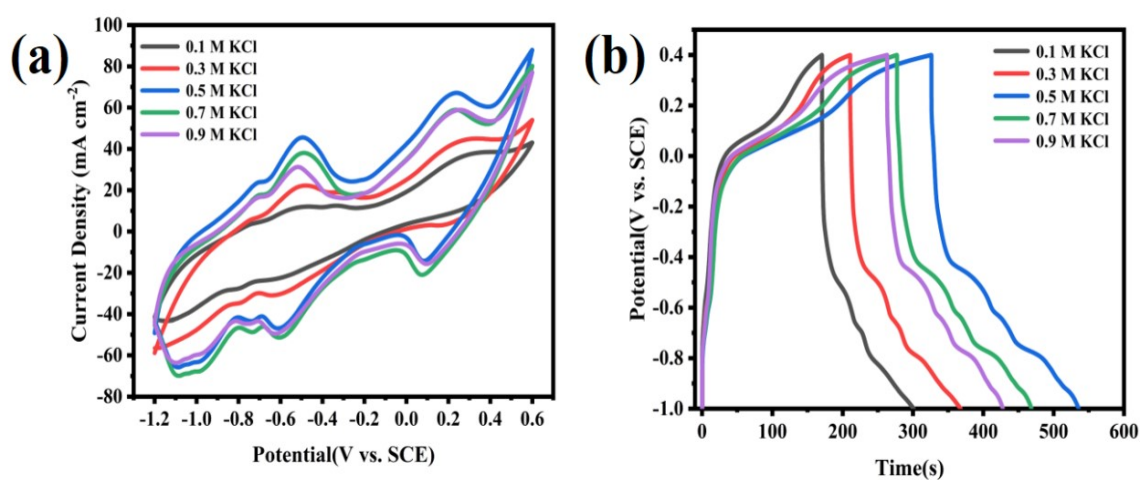

**Fig.S6.** Electrochemical properties of Cu@N-C-600 with different concentrations of KCl in the electrolyte. (a)CV curves at scan rate of 20 mV s<sup>-1</sup> and (b)GCD curves at current density of 20 mA cm<sup>-2</sup>.

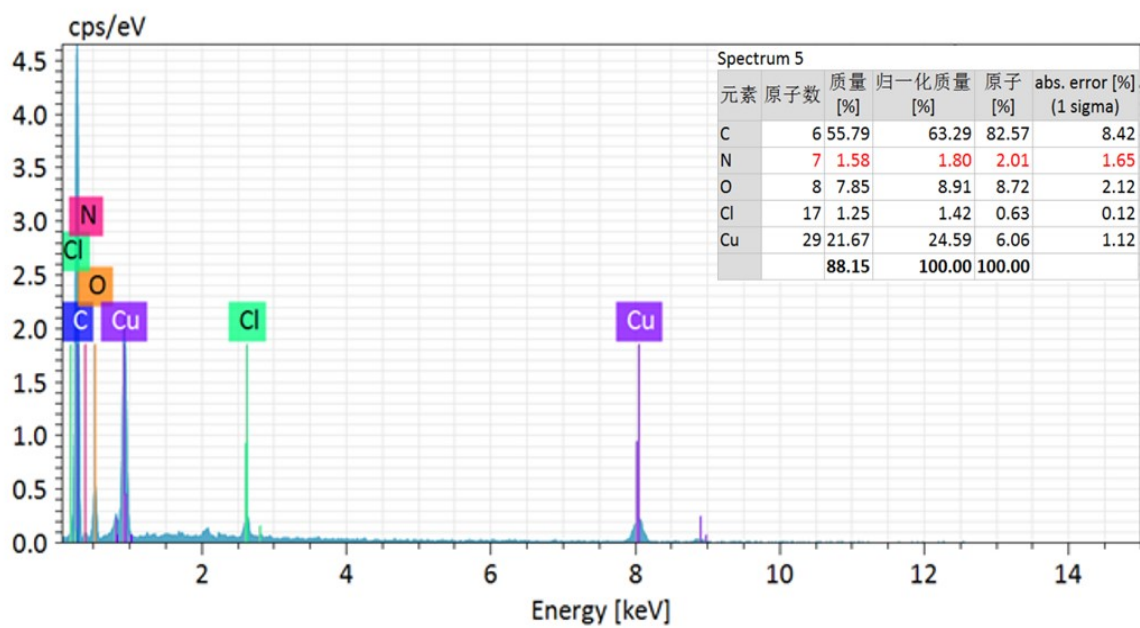

Fig.S7. EDS spectrum of Cu@N-C-600.

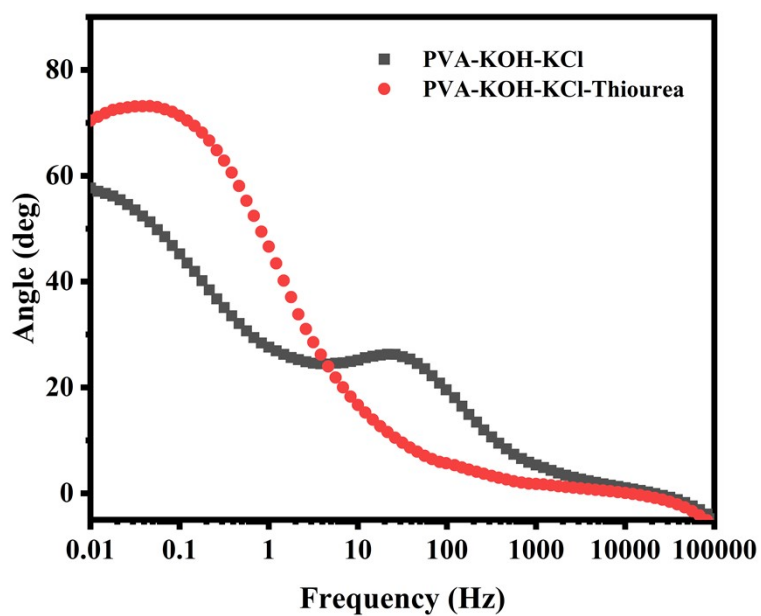

Fig.S8. The bode plot of Cu@N-C-600 // Cu@N-C-600 in different electrolyte.

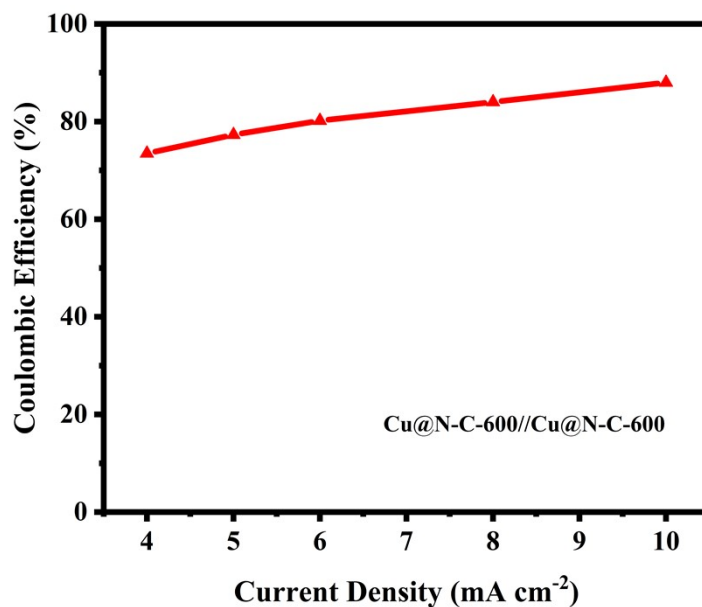

**Fig.S9.** Coulombic efficiency diagram for two-electrode system in different current density.

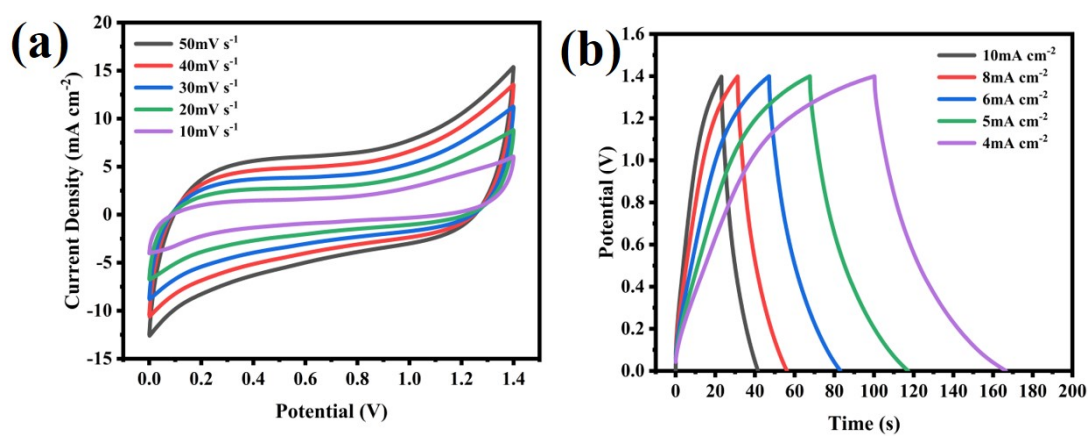

**Fig.S10.** Electrochemical test of Cu@N-C-600 // Cu@N-C-600 supercapacitor in PVA-KOH-KCl gel electrolyte (a)CV at different scan rate; (b)GCD curves at different current density.

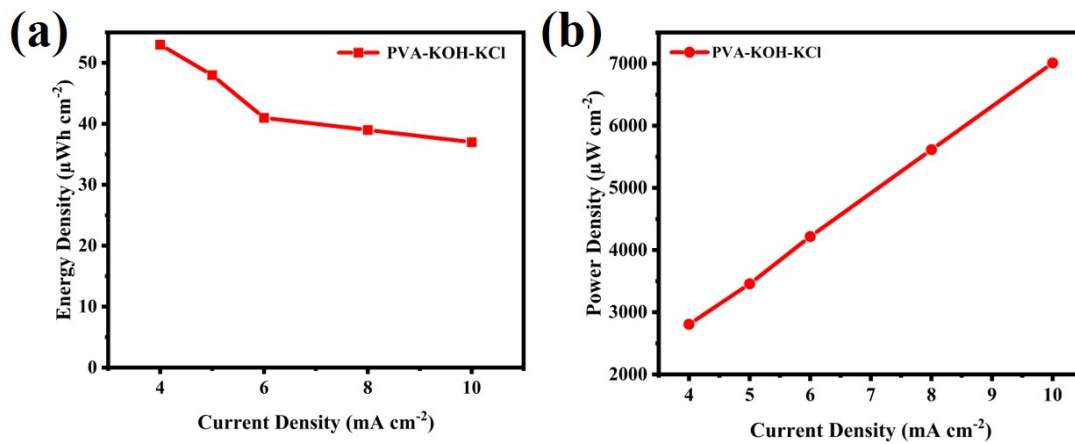

**Fig.S11.** Performance of Cu@N-C-600 // Cu@N-C-600 supercapacitor in PVA-KOH-KCl gel electrolyte. (a) energy density and (b)power density at different current densities.

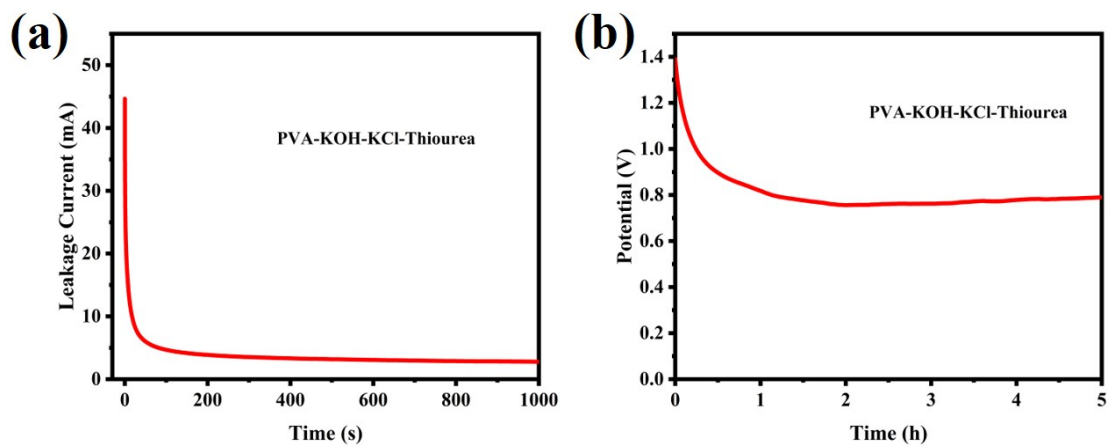

**Fig. S12.** Cu@N-C-600 SC in PVA-KOH-KCl-Thiourea gel electrolyte (a) leakage current and (b) self-discharge.

In order to further evaluate the stability of supercapacitors more accurately. The floating test was also applied to the supercapacitors. Simply put, the Cu@N-C-600 samples were performed between 0-1.4V utilizing a constant current density of 5 mA cm<sup>-2</sup>. Every 2h of adding, three GCD cycles were applied. Then, the specific capacitance was calculated from the first and third discharging time, respectively.



These sequences were repeated 20 times, a total floating time of 40h. And the results are shown below.

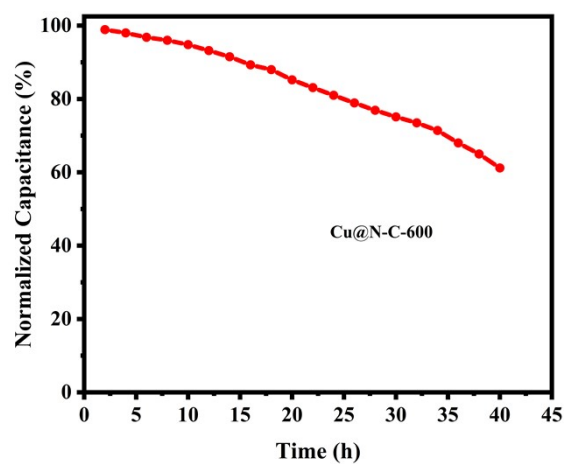

**Fig. S13.** The floating test of the Cu@N-C-600//Cu@N-C-600.

- [1] W. Li, X. Wang, N. Zhang, M. Ma, Strong and Robust Polyaniline-Based Supramolecular Hydrogels for Flexible Supercapacitors, *Angew. Chem. Int. Ed.* 55 (2016) 9196-9201.
- [2] W. Li, H. Lu, N. Zhang, M. Ma, Enhancing the Properties of Conductive Polymer Hydrogels by Freeze–Thaw Cycles for High-Performance Flexible Supercapacitors, *ACS Appl. Mater. Inter.* 9 (2017) 20142-20149.
